# Supplementary material
Source: PubMed Central journal article supplement (PMC9523583)
Supplement: NIHMS1595224-supplement-Supplemental_Material.pdf [file NIHMS1595224-supplement-Supplemental_Material.pdf]

## **SUPPLEMENTAL MATERIAL**

**Supplemental Table I. Demographic and clinical characteristics of POINT participants who provided DNA for this substudy versus those who did not, stratified by treatment group.**

| Characteristic                                          | Provided DNA     |                               |              | No DNA            |                                   |              |
|---------------------------------------------------------|------------------|-------------------------------|--------------|-------------------|-----------------------------------|--------------|
|                                                         | Aspirin<br>n=475 | Clopidogrel-<br>Aspirin n=475 | Total n=932  | Aspirin<br>n=1974 | Clopidogrel-<br>Aspirin<br>n=1975 | Total n=3949 |
| Age in years, median (IQR)                              | 63 (54-73)       | 63 (53-72)                    | 63 (53.5-72) | 65 (56-74)        | 65 (56-75)                        | 65 (56-75)   |
| Hours from symptom onset to randomization, median (IQR) | 7 (5-10)         | 7 (5-10)                      | 7 (5-10)     | 7 (5-10)          | 7 (5-10)                          | 7 (5-10)     |
| Male, No (%)                                            | 271 (57.1)       | 259 (56.7)                    | 530 (56.9)   | 1080 (54.7)       | 1076 (54.5)                       | 2156 (54.6)  |
| White race                                              | 337 (70.9)       | 323 (70.7)                    | 660 (70.8)   | 1444 (73.2)       | 1451 (73.5)                       | 2895 (73.3)  |
| Black/AA                                                | 110 (23.2)       | 106 (23.2)                    | 216 (23.2)   | 383 (19.4)        | 367 (18.6)                        | 750 (19.0)   |
| Other                                                   | 28 (5.9)         | 28 (6.1)                      | 56 (6.0)     | 147 (7.4)         | 157 (7.9)                         | 304 (7.7)    |
| <b>Medical history</b>                                  |                  |                               |              |                   |                                   |              |
| Heart disease                                           | 40 (8.4%)        | 46 (10.1%)                    | 86 (9.3%)    | 200 (10.2%)       | 211 (10.7%)                       | 411 (10.4%)  |
| Congestive heart failure                                | 7 (1.5%)         | 14 (3.1%)                     | 21 (2.3%)    | 55 (2.8%)         | 50 (2.5%)                         | 105 (2.7%)   |
| Atrial fibrillation                                     | 3 (0.6%)         | 4 (0.9%)                      | 7 (0.8%)     | 15 (0.8%)         | 27 (1.4%)                         | 42 (1.1%)    |
| Valvular heart disease                                  | 7 (1.5%)         | 6 (1.3%)                      | 13 (1.4%)    | 27 (1.4%)         | 43 (2.2%)                         | 70 (1.8%)    |
| Hypertension                                            | 325 (68.7%)      | 321 (70.2%)                   | 646 (69.5%)  | 1355 (69.0%)      | 1372 (69.8%)                      | 2727 (69.4%) |
| Diabetes mellitus                                       | 132 (27.8%)      | 113 (24.9%)                   | 245 (26.4%)  | 530 (26.9%)       | 565 (28.7%)                       | 1095 (27.8%) |
| Current or prior smoker                                 | 214 (45.1%)      | 220 (48.1%)                   | 434 (46.6%)  | 951 (48.2%)       | 951 (48.2%)                       | 1902 (48.2%) |
| <b>Index event</b>                                      |                  |                               |              |                   |                                   |              |
| TIA                                                     | 200 (42.1%)      | 202 (44.2%)                   | 402 (43.1%)  | 852 (43.2%)       | 854 (43.2%)                       | 1706 (43.2%) |
| Minor stroke                                            | 275 (57.9%)      | 255 (55.8%)                   | 530 (56.9%)  | 1122 (56.8%)      | 1121 (56.8%)                      | 2243 (56.8%) |
| <b>Prior medication use</b>                             |                  |                               |              |                   |                                   |              |
| Aspirin                                                 | 281 (59.2%)      | 268 (58.6%)                   | 549 (58.9%)  | 1116 (56.5%)      | 1149 (58.2%)                      | 2265 (57.4%) |
| Clopidogrel                                             | 10 (2.1%)        | 7 (1.5%)                      | 17 (1.8%)    | 32 (1.6%)         | 41 (2.1%)                         | 73 (1.8%)    |
| Antihypertensives                                       | 171 (53.3%)      | 161 (52.6%)                   | 332 (53.0%)  | 528 (51.5%)       | 541 (53.0%)                       | 1069 (52.2%) |
| Statins                                                 | 189 (39.9%)      | 176 (38.5%)                   | 365 (39.2%)  | 743 (37.6%)       | 782 (39.6%)                       | 1525 (38.6%) |
| Other lipid lowering treatment                          | 18 (3.8%)        | 12 (2.6%)                     | 30 (3.2%)    | 112 (5.7%)        | 97 (4.9%)                         | 209 (5.3%)   |
